# Supplementary material for: Genetic variants in RhoA and ROCK1 genes are associated with the development, progression and prognosis of prostate cancer
Source: PubMed Central journal article supplement (PMC5386685; doi:10.18632/oncotarget.15197), 2017-02-08
Supplement: oncotarget-08-19298-s001.pdf [file oncotarget-08-19298-s001.pdf]

# Genetic variants in RhoA and ROCK1 genes are associated with the development, progression and prognosis of prostate cancer

## Supplementary Materials

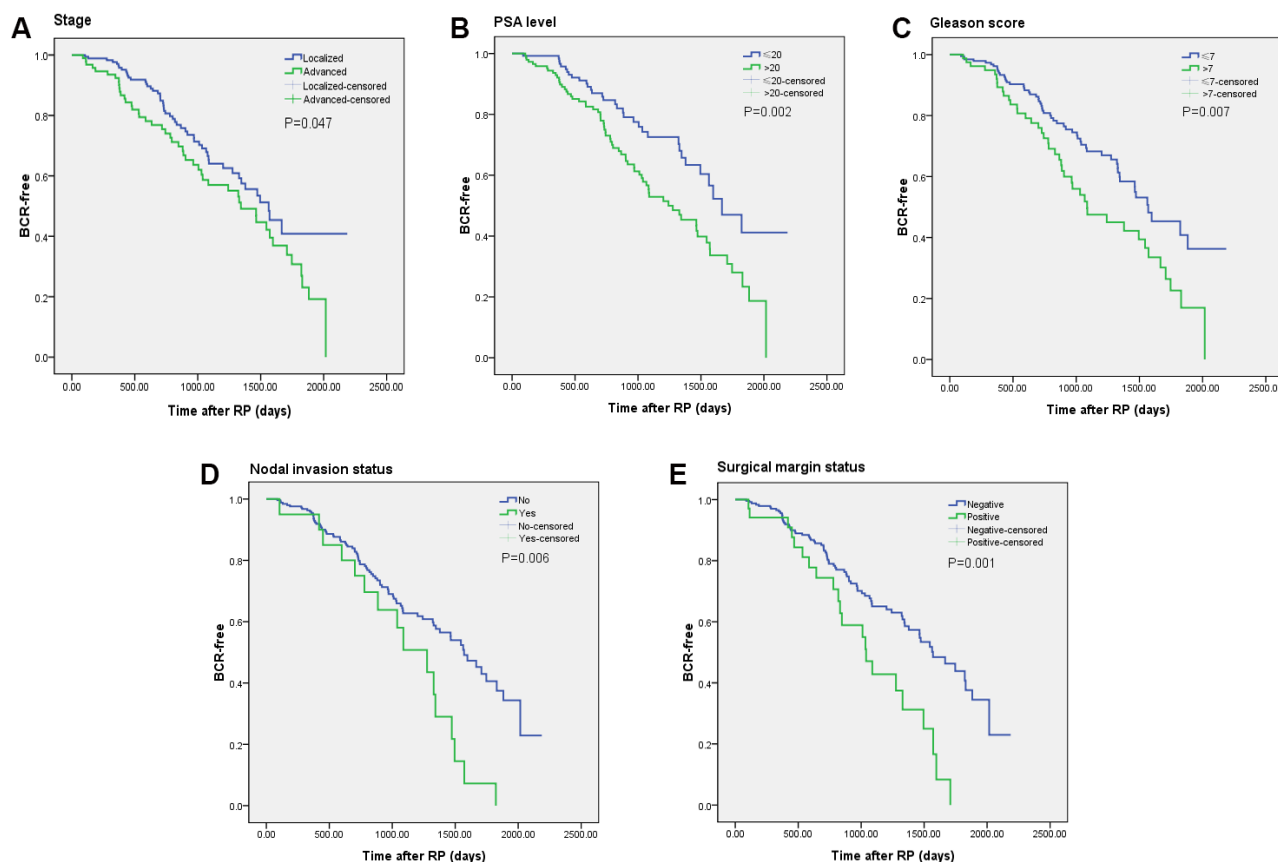

**Supplementary Figure 1: Kaplan-Meier curves of biochemical recurrence for (A) stage, (B) PSA level, (C) Gleason score, (D) Nodal invasion status and (E) Surgical margin status in a cohort of 289 PCa patients after radical prostatectomy. Log-rank (LR) P values are shown in each frame.**

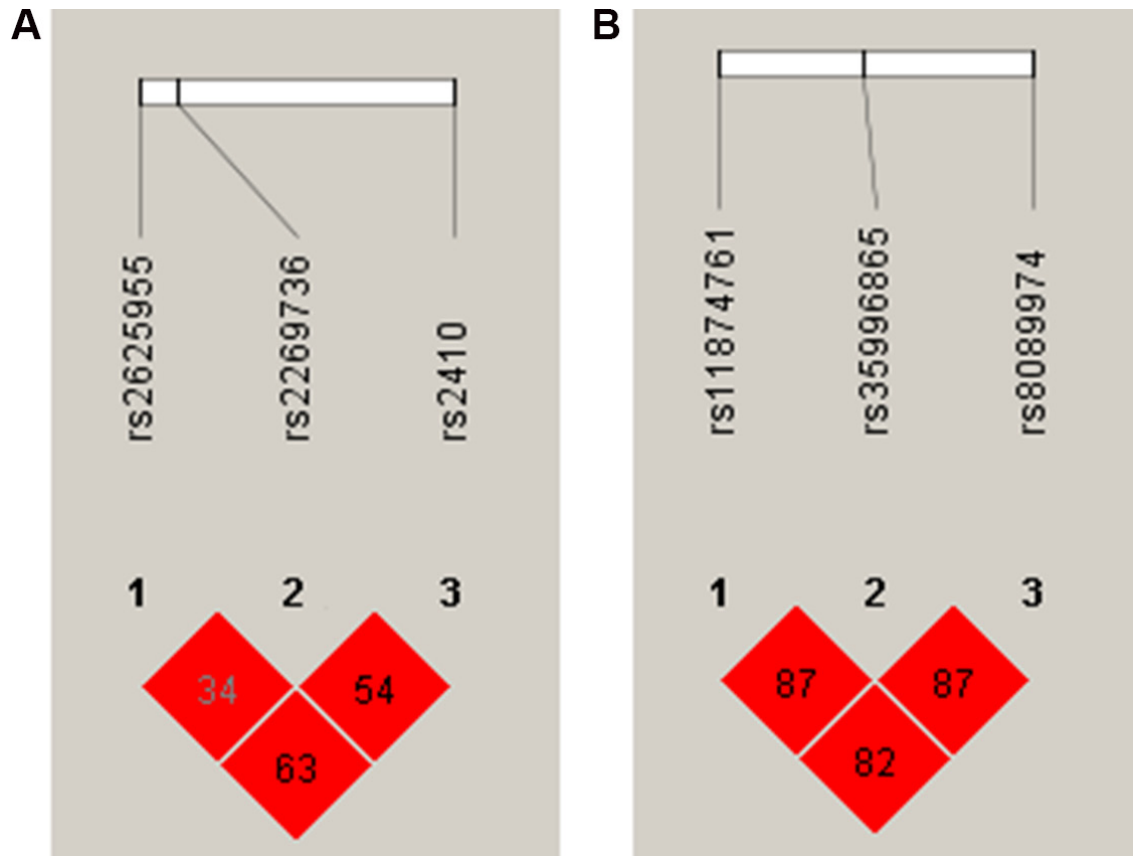

**Supplementary Figure 2: Haplotype block map for RhoA tSNPs and ROCK1 tSNPs.** (A) RhoA tSNPs includes rs2625955, rs2269736 and rs2410, (B) ROCK1 tSNPs includes rs11874761, rs35996865 and 8089974. The linkage magnitude between polymorphisms was qualified by the  $D'$  and logarithm of odds (LOD). The linkage plot was displayed according to the standard color scheme.

**Supplementary Table 1A: Stratification analysis of rs2410 and PCa risk.** See Supplementary\_Table\_1A

**Supplementary Table 1B: Stratification analysis of rs2625955 and PCa risk.** See Supplementary\_Table\_1B

**Supplementary Table 1C: Stratification analysis of rs2269736 and PCa risk.** See Supplementary\_Table\_1C

**Supplementary Table 1D: Stratification analysis of rs11874761 and PCa risk.** See Supplementary\_Table\_1D

**Supplementary Table 1E: Stratification analysis of rs35996865 and PCa risk.** See Supplementary\_Table\_1E

**Supplementary Table 1F: Stratification analysis of rs8089974 and PCa risk.** See Supplementary\_Table\_1F

**Supplementary Table 2A: Association between rs2410 and clinicopathologic parameters of PCa.** See Supplementary\_Table\_2A

**Supplementary Table 2B: Association between rs2625955 and clinicopathologic parameters of PCa.** See Supplementary\_Table\_2B

**Supplementary Table 2C: Association between rs2625955 and clinicopathologic parameters of PCa.** See Supplementary\_Table\_2C

**Supplementary Table 2D: Association between rs11874761 and clinicopathologic parameters of PCa.** See Supplementary\_Table\_2D

**Supplementary Table 2E: Association between rs35996865 and clinicopathologic parameters of PCa.** See Supplementary\_Table\_2E

**Supplementary Table 2F: Association between rs8089974 and clinicopathologic parameters of PCa.** See Supplementary\_Table\_2F.

**Supplementary Table 2G: Association between number of risk alleles and clinicopathologic parameters of PCa.** See Supplementary\_Table\_2G

**Supplementary Table 3: Clinico-pathological characteristics of study populations included in biochemical recurrence analysis**

| <b>Variables</b>                | <b>N</b> | <b>Percentage</b> |
|---------------------------------|----------|-------------------|
| <b>Total cases</b>              | 289      | 100               |
| <b>Biochemical recurrence</b>   |          |                   |
| No                              | 189      | 65.4              |
| Yes                             | 100      | 34.6              |
| <b>Age (median ± SD)</b>        | 71       | ±7.58             |
| <b>PSA at diagnosis (ng/ml)</b> |          |                   |
| ≤ 10                            | 134      | 46.4              |
| > 10                            | 155      | 53.6              |
| <b>Gleason score</b>            |          |                   |
| ≤ 7                             | 203      | 70.2              |
| > 7                             | 86       | 29.8              |
| <b>Stage</b>                    |          |                   |
| localized                       | 190      | 65.7              |
| Advanced                        | 99       | 34.3              |
| <b>Nodal invasion</b>           |          |                   |
| No                              | 225      | 77.9              |
| Yes                             | 64       | 22.1              |
| <b>Margin status</b>            |          |                   |
| Negative                        | 227      | 78.5              |
| Positive                        | 62       | 21.5              |
| <b>Smoke status</b>             |          |                   |
| Never                           | 121      | 41.9              |
| Ever                            | 168      | 58.1              |
| <b>Drinking status</b>          |          |                   |
| Never                           | 204      | 70.6              |
| Ever                            | 85       | 29.4              |

SD = standard deviation; PSA = prostate-specific antigen.
